# Supplementary material for: An Nfic-hedgehog signaling cascade regulates tooth root development
Source: Oxford University Press journal article supplement (doi:10.1242/dev.127068), 2015-01-01
Supplement: dev127068supp.pdf [file dev127068supp.pdf]

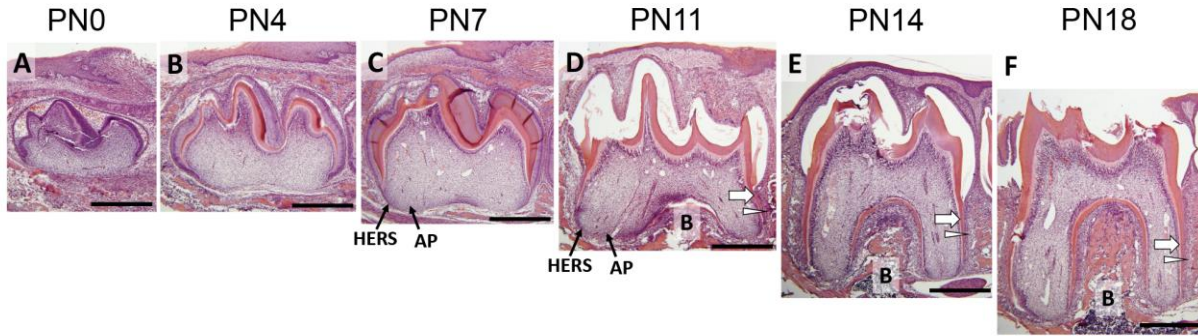

**Fig. S1. Postnatal developmental stages of the first mandibular molar. (A-F)** HE staining of first mandibular molars from control mice at the indicated ages, PN0 to PN18. White arrows indicate root dentin, white arrowheads indicate periodontal ligament. HERS, Hertwig's Epithelial Root Sheath; AP, apical papilla; B, alveolar bone. Scale bars: 500 μm.

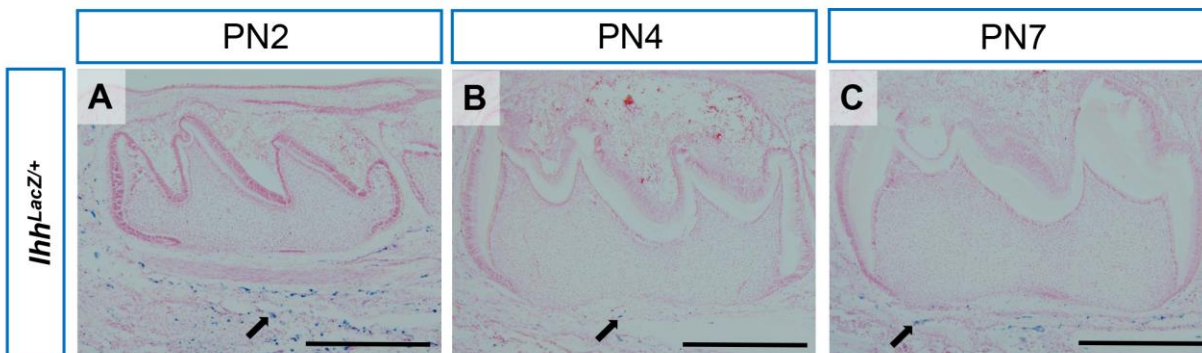

**Fig. S2. *Ihh* is undetectable in developing molars. (A-C)** X-gal staining of *Ihh<sup>lacZ/+</sup>* mice at PN2, PN4 and PN7. Arrows indicate positive signal in the bone. Scale bars: 500 μm.

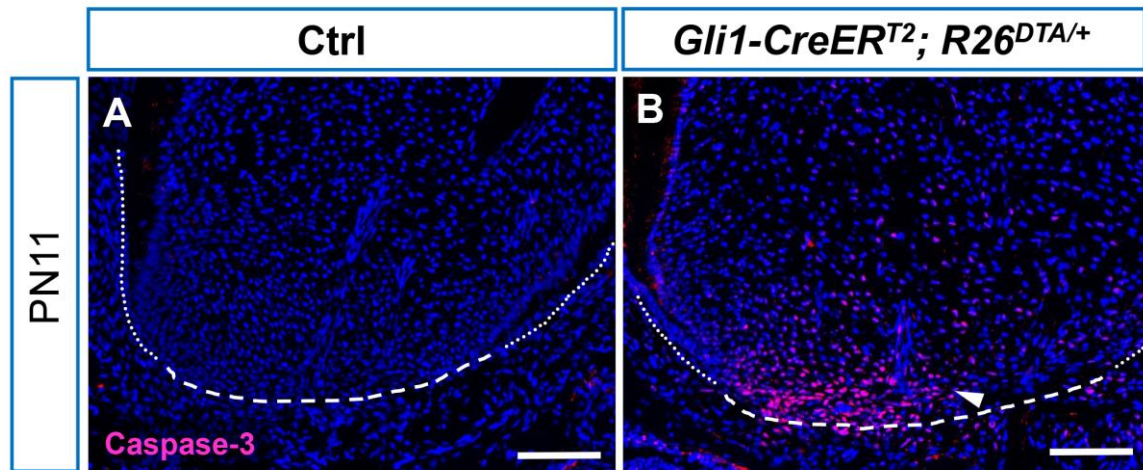

**Fig. S3. Elevated apoptosis in developing molars of *Gli1-CreERT2;R26<sup>DTA/+</sup>* mice.** (A-B) Immunostaining of active- and pro-caspase-3 (red) in the mesial apical papilla of first mandibular molars from PN11 control (Ctrl) and *Gli1-CreERT2;R26<sup>DTA/+</sup>* mice after tamoxifen injection at PN3. White arrowhead indicates positive signal. Dotted lines indicate the HERS, dashed lines indicate the border of the apical papilla. Scale bars: 100 μm.

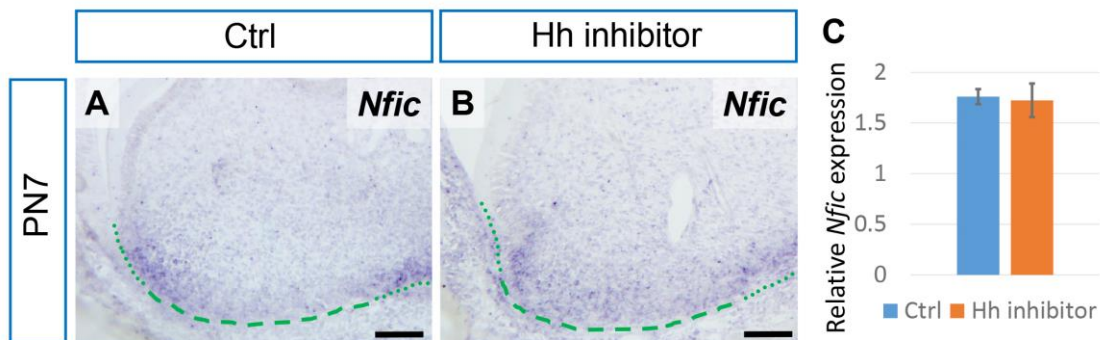

**Fig. S4. *Nfic* expression is not significantly changed after inhibition of Hedgehog signaling.** (A-B) *in situ* hybridization of *Nfic* in the first mandibular molars of PN7 control mice untreated (Ctrl) or treated with Hh inhibitor. Dotted lines indicate the HERS, dashed lines indicate the border of the apical papilla. (C) Quantitative RT-PCR of *Nfic* from the apical tissue of first mandibular molars of PN7 control mice untreated (Ctrl) or treated with Hh inhibitor. n=3 per group. Scale bars: 100 μm.

**Table S1. Animal information**

| Mouse line                      | Full name                                                       | Source                             | Reference                     |
|---------------------------------|-----------------------------------------------------------------|------------------------------------|-------------------------------|
| <i>Shh-CreER<sup>T2</sup></i>   | B6.129S6- <i>Shh<sup>tm2(cre/ERT2)Cjt/J</sup></i>               | JAX #005623                        | (Harfe et al., 2004)          |
| <i>R26<sup>tdTomato/+</sup></i> | B6;129S6- <i>Gt(ROSA)26Sor<sup>tm9(CAG-tdTomato)Hze/J</sup></i> | JAX #007905                        | (Madisen et al., 2010)        |
| <i>Gli1<sup>lacZ/+</sup></i>    | <i>Gli1<sup>tm2Alj/J</sup></i>                                  | JAX #008211                        | (Bai et al., 2002)            |
| <i>Gli1-CreER<sup>T2</sup></i>  | <i>Gli1<sup>tm3(cre/ERT2)Alj/J</sup></i>                        | JAX #007913                        | (Ahn and Joyner, 2004)        |
| <i>R26<sup>DTA/+</sup></i>      | <i>Gt(ROSA)26Sor<sup>tm1(DTA)Jpmb/J</sup></i>                   | JAX #006331                        | (Ivanova et al., 2005)        |
| <i>R26SmoM2<sup>fl/fl</sup></i> | <i>Gt(ROSA)26Sor<sup>tm1(Smo/EYFP)Amc/J</sup></i>               | JAX #005130                        | (Jeong et al., 2004)          |
| <i>Nfic<sup>-/-</sup></i>       | <i>Nfic<sup>-/-</sup></i>                                       | Gift from Dr. Richard Gronostajski | (Steele-Perkins et al., 2003) |
| <i>Ihh<sup>lacZ/+</sup></i>     | <i>Ihh-nLacZ</i>                                                | Gift from Dr. Andrew McMahon       | (Fabian et al., 2012)         |

**Table S2.**

[Click here to Download Table S2](#)

## References

- Ahn, S. and Joyner, A. L.** (2004). Dynamic changes in the response of cells to positive hedgehog signaling during mouse limb patterning. *Cell* **118**, 505-516.
- Bai, C. B., Auerbach, W., Lee, J. S., Stephen, D. and Joyner, A. L.** (2002). Gli2, but not Gli1, is required for initial Shh signaling and ectopic activation of the Shh pathway. *Development* **129**, 4753-4761.
- Fabian, S. L., Penchev, R. R., St-Jacques, B., Rao, A. N., Sipila, P., West, K. A., McMahon, A. P. and Humphreys, B. D.** (2012). Hedgehog-Gli pathway activation during kidney fibrosis. *Am J Pathol* **180**, 1441-1453.
- Harfe, B. D., Scherz, P. J., Nissim, S., Tian, H., McMahon, A. P. and Tabin, C. J.** (2004). Evidence for an expansion-based temporal Shh gradient in specifying vertebrate digit identities. *Cell* **118**, 517-528.
- Ivanova, A., Signore, M., Caro, N., Greene, N. D., Copp, A. J. and Martinez-Barbera, J. P.** (2005). In vivo genetic ablation by Cre-mediated expression of diphtheria toxin fragment A. *Genesis* **43**, 129-135.
- Jeong, J., Mao, J., Tenzen, T., Kottmann, A. H. and McMahon, A. P.** (2004). Hedgehog signaling in the neural crest cells regulates the patterning and growth of facial primordia. *Genes Dev* **18**, 937-951.
- Madisen, L., Zwingman, T. A., Sunkin, S. M., Oh, S. W., Zariwala, H. A., Gu, H., Ng, L. L., Palmiter, R. D., Hawrylycz, M. J., Jones, A. R., et al.** (2010). A robust and high-throughput Cre reporting and characterization system for the whole mouse brain. *Nat Neurosci* **13**, 133-140.
- Steele-Perkins, G., Butz, K. G., Lyons, G. E., Zeichner-David, M., Kim, H. J., Cho, M. I. and Gronostajski, R. M.** (2003). Essential role for NFI-C/CTF transcription-replication factor in tooth root development. *Mol Cell Biol* **23**, 1075-1084.
